# Supplementary material for: Acetate Degradation at Low pH by the Moderately Acidophilic Sulfate Reducer Acididesulfobacillus acetoxydans gen. nov. sp. nov.
Source: Frontiers journal article supplement (doi:10.3389/fmicb.2022.816605), 2022-03-04
Supplement: Table_1.XLS [file Table_1.XLS]

## Sheet: matrix
genome	Candidatus_Desulforudis_audaxviator_MP104C.gbk_protein_multifasta	Dehalobacter_restrictus_DSM_9455.gbk_protein_multifasta	Dehalobacter_sp._11DCA.gbk_protein_multifasta	Dehalobacter_sp._CF.gbk_protein_multifasta	Desulfitibacter_alkalitolerans_DSM_16504.gbk_protein_multifasta	Desulfitobacterium_dehalogenans_JW_IU-DC1,_ATCC_51507.gbk_protein_multifasta	Desulfitobacterium_dichloroeliminans_LMG_P-21439.gbk_protein_multifasta	Desulfitobacterium_hafniense_DCB-2.gbk_protein_multifasta	Desulfitobacterium_hafniense_PCE-S.protein_multifasta	Desulfitobacterium_hafniense_PCP-1.gbk_protein_multifasta	Desulfitobacterium_hafniense_TCE-1.gbk_protein_multifasta	Desulfitobacterium_hafniense_TCP-A.gbk_protein_multifasta	Desulfitobacterium_hafniense_Y51.gbk_protein_multifasta	Desulfitobacterium_metallireducens_853-15A,_DSM_15288.gbk_protein_multifasta	Desulfitobacterium_sp._LBE.gbk_protein_multifasta	Desulfitobacterium_sp._PCE1,_DSM_10344.gbk_protein_multifasta	Desulfobacillus	Desulfonispora_thiosulfatigenes_GKNTAUT_,_DSM_11270.gbk_protein_multifasta	desulfosporosinus_acididurans_strain_M1	Desulfosporosinus_acidiphilus_DSM_22704_all	Desulfosporosinus_meridiei_DSM_13257	Desulfosporosinus_orientis_DSM_765	Desulfosporosinus_sp._HMP52.gbk_protein_multifasta	Desulfosporosinus_sp._Tol-M_Ga0063340	Desulfosporosinus_youngiae_DSM_17734	Desulfotomaculum_acetoxidans_5575_DSM_771	Desulfotomaculum_alcoholivorax_DSM_16058.gbk_protein_multifasta	Desulfotomaculum_alkaliphilum_DSM_12257.gbk_protein_multifasta	Desulfotomaculum_arcticum_DSM_17038.gbk_protein_multifasta	Desulfotomaculum_carboxydivorans_CO-1-SRB,_DSM_14880.gbk_protein_multifasta	Desulfotomaculum_geothermicum_DSM_3669.gbk_protein_multifasta	Desulfotomaculum_gibsoniae_Groll_DSM_7213	Desulfotomaculum_guttoideum_DSM_4024	Desulfotomaculum_hydrothermale_Lam5	Desulfotomaculum_kuznetsovii_17_DSM_6115	Desulfotomaculum_nigrificans_DSM_574.gbk_protein_multifasta	Desulfotomaculum_reducens_MI-1	Desulfotomaculum_ruminis_DL_DSM_2154	Desulfotomaculum_thermocisternum_DSM_10259.gbk_protein_multifasta	Desulfotomaculum_thermosapovorans_DSM_6562.gbk_protein_multifasta	Desulfurispora_thermophila_DSM_16022.gbk_protein_multifasta	Pelotomaculum_thermopropionicum_SI	Pelotomaculum_thermopropionicum_SI.gbk_protein_multifasta	Syntrophobotulus_glycolicus_FlGlyR,_DSM_8271.gbk_protein_multifasta	Thermincola_ferriacetica_DSM_14005.gbk_protein_multifasta	Thermincola_potens_JR.gbk_protein_multifasta	peptococcaceae_bacterium_CEB3
Candidatus_Desulforudis_audaxviator_MP104C.gbk_protein_multifasta	100	50.46	50.6	50.61	51.37	50.98	50.96	50.92	50.82	50.86	50.88	50.86	50.83	51.42	50.94	51.09	51.87	50.39	50.94	50.55	51.11	50.92	50.9	51.03	51.16	55.55	56.36	56.14	55.35	56.69	56.54	55.92	46.45	56.78	59.58	56.79	55.61	55.93	59.04	56.4	56.67	58.18	58.2	50.49	54.17	54.42	51.82
Dehalobacter_restrictus_DSM_9455.gbk_protein_multifasta	50.46	100	95.26	95.32	52.02	58.46	59.03	59	59.28	58.64	59.27	58.78	58.93	58.74	58.81	58.72	57.73	51.63	58.32	58.66	58.82	58.84	58.72	59.36	58.75	52.04	51.77	51.14	51.87	52.1	51.21	51.31	48.34	52.36	51.94	51.95	51.88	52.09	51.84	51.77	51.54	51.85	51.84	63.11	52.98	52.94	57.73
Dehalobacter_sp._11DCA.gbk_protein_multifasta	50.6	95.26	100	99.77	53.05	58.67	59.63	58.77	59.36	58.89	59.63	58.61	59.49	58.69	59.22	58.78	57.95	51.45	58.4	58.89	58.86	58.52	58.39	59.35	58.72	53.52	52.11	51.31	52	52.06	51.63	53.19	47.96	52.34	51.83	52.01	52.2	51.89	52	51.89	51.47	51.8	51.8	62.84	52.98	52.79	57.95
Dehalobacter_sp._CF.gbk_protein_multifasta	50.61	95.32	99.77	100	52.75	58.66	59.2	58.74	59.26	58.64	59.63	58.88	59.61	58.54	58.95	58.78	57.92	51.29	58.37	58.84	58.83	58.42	58.38	59.3	58.67	52.77	52.08	51.22	52.28	52.11	51.62	52.12	47.89	52.3	51.85	52.05	52.09	51.81	52.04	51.78	51.47	51.78	51.78	62.84	52.97	52.76	57.98
Desulfitibacter_alkalitolerans_DSM_16504.gbk_protein_multifasta	51.37	52.02	53.05	52.75	100	51.08	52.27	50.99	52.52	51.25	51.39	51.36	51.19	51.53	52.47	51.1	51.85	52.61	50.67	51.3	51.21	51.46	51.19	53.1	51.71	53.11	52.89	53.21	52.27	53.07	52.16	52.61	47.05	53.72	52.46	52.85	53.06	52.59	52.75	52.36	52.08	52.59	52.59	51.14	53.89	53.7	51.4
Desulfitobacterium_dehalogenans_JW_IU-DC1,_ATCC_51507.gbk_protein_multifasta	50.98	58.46	58.67	58.66	51.08	100	79.93	87.96	87.71	87.73	87.76	87.91	87.86	68.4	87.75	99.11	62.1	51.84	63.17	63.5	64.05	63.89	64	63.38	65.09	52.19	51.87	52.11	51.33	53.43	51.92	51.61	49.48	53.63	52.68	53.22	53.74	53.14	52.75	52.67	52.18	52.65	52.67	58.48	53.48	53.47	61.87
Desulfitobacterium_dichloroeliminans_LMG_P-21439.gbk_protein_multifasta	50.96	59.03	59.63	59.2	52.27	79.93	100	79.25	79.41	79.02	79.46	79.3	79.61	68.3	79.35	79.91	62.08	51.99	63.13	63.39	63.9	63.34	64.05	63.38	64.84	53.45	51.9	52.62	51.59	53.18	51.86	52.8	48.82	53.34	52.76	53.14	53.25	52.57	52.83	52.15	51.97	52.58	52.58	58.41	53.14	53.03	61.82
Desulfitobacterium_hafniense_DCB-2.gbk_protein_multifasta	50.92	59	58.77	58.74	50.99	87.96	79.25	100	97.95	98.26	97.91	96.99	97.92	67.98	97.67	87.94	62.15	51.82	63.22	63.31	63.76	63.62	63.69	63.58	65.59	52.4	51.9	52.21	51.91	53.23	51.75	52.02	50.31	53.52	52.25	52.94	53.35	54.05	52.47	52.32	51.77	52.12	52.09	58.36	53.25	53.32	61.52
Desulfitobacterium_hafniense_PCE-S.protein_multifasta	50.82	59.28	59.36	59.26	52.52	87.71	79.41	97.95	100	97.81	98.39	96.85	98.37	68.04	97.53	87.78	62.14	51.83	62.95	63.43	63.69	63.5	63.76	63.82	65.39	52.6	52.61	52.17	52.02	53.23	51.74	52.88	50.14	53.61	52.34	52.93	53.36	53.95	52.58	52.36	51.75	52.22	52.24	59.09	53.3	53.21	61.45
Desulfitobacterium_hafniense_PCP-1.gbk_protein_multifasta	50.86	58.64	58.89	58.64	51.25	87.73	79.02	98.26	97.81	100	97.82	96.92	97.81	67.93	97.35	87.8	61.99	51.76	62.96	63.23	63.62	63.6	63.73	63.08	65.25	52.57	51.72	52.05	51.78	53.15	51.72	52.12	50.09	53.19	52.11	52.66	53.39	53.77	52.56	52.34	51.69	52.03	52.03	59.03	53.24	53.16	61.46
Desulfitobacterium_hafniense_TCE-1.gbk_protein_multifasta	50.88	59.27	59.63	59.63	51.39	87.76	79.46	97.91	98.39	97.82	100	96.64	99.16	67.96	97.58	87.87	61.85	51.89	63.03	63.37	63.85	63.5	63.83	63.35	65.48	52.75	51.79	52.19	51.92	53.19	51.79	52.59	50.05	53.58	52.38	52.96	53.3	54.06	52.54	52.46	51.74	52.15	52.17	58.89	53.36	53.34	61.32
Desulfitobacterium_hafniense_TCP-A.gbk_protein_multifasta	50.86	58.78	58.61	58.88	51.36	87.91	79.3	96.99	96.85	96.92	96.64	100	96.63	67.95	96.78	87.88	62.2	51.73	63.42	63.6	63.8	63.68	63.86	63.41	64.9	52.76	51.9	52.23	51.71	53.35	51.93	51.98	49.62	53.51	52.33	53.11	53.59	53.74	52.69	52.3	51.78	52.34	52.34	59.23	53.33	53.31	61.41
Desulfitobacterium_hafniense_Y51.gbk_protein_multifasta	50.83	58.93	59.49	59.61	51.19	87.86	79.61	97.92	98.37	97.81	99.16	96.63	100	68.06	97.37	87.73	61.77	51.97	63.11	63.59	63.64	63.47	63.76	63.5	65.67	52.78	51.91	52.2	51.62	53.15	51.76	52.64	50.29	53.56	52.37	53.03	53.35	53.97	52.66	52.45	51.82	52.15	52.17	59.05	53.29	53.2	61.27
Desulfitobacterium_metallireducens_853-15A,_DSM_15288.gbk_protein_multifasta	51.42	58.74	58.69	58.54	51.53	68.4	68.3	67.98	68.04	67.93	67.96	67.95	68.06	100	67.95	68.48	63.94	51.91	64.86	64.9	65.24	65.12	65.19	64.97	65.42	52.63	52.35	52.15	51.78	53.52	51.8	52.05	48.04	53.63	52.99	53.45	53.68	52.86	53.05	52.2	52.48	52.63	52.63	58.15	53.62	53.41	63.67
Desulfitobacterium_sp._LBE.gbk_protein_multifasta	50.94	58.81	59.22	58.95	52.47	87.75	79.35	97.67	97.53	97.35	97.58	96.78	97.37	67.95	100	87.94	61.91	51.93	63.07	63.52	63.66	63.53	63.69	63.36	65.68	52.77	51.69	52.28	51.65	53.11	51.81	52.43	49.95	53.41	52.21	52.95	53.43	54.09	52.6	52.31	51.75	52	52.08	58.34	53.28	53.14	61.36
Desulfitobacterium_sp._PCE1,_DSM_10344.gbk_protein_multifasta	51.09	58.72	58.78	58.78	51.1	99.11	79.91	87.94	87.78	87.8	87.87	87.88	87.73	68.48	87.94	100	62.13	51.81	63.32	63.44	63.99	64	64	63.39	65.05	52.44	51.9	52.19	51.45	53.4	52	51.84	49.32	53.6	52.74	53.07	53.64	53.34	52.81	52.58	52.08	52.73	52.68	58.44	53.56	53.43	61.99
Desulfobacillus	51.87	57.73	57.95	57.92	51.85	62.1	62.08	62.15	62.14	61.99	61.85	62.2	61.77	63.94	61.91	62.13	100	51.3	63.87	64.36	63.07	63.01	63.19	64.21	62.79	52.46	52.7	52.09	52.02	53.52	52.77	52.49	46.79	53.57	53.89	53.51	52.83	52.45	53.83	52.61	53.2	53.22	53.22	57.08	53.28	53.31	89.3
Desulfonispora_thiosulfatigenes_GKNTAUT_,_DSM_11270.gbk_protein_multifasta	50.39	51.63	51.45	51.29	52.61	51.84	51.99	51.82	51.83	51.76	51.89	51.73	51.97	51.91	51.93	51.81	51.3	100	50.93	51.36	51.61	51.43	51.4	51.39	51.59	51.61	51.49	52.63	51.28	52.59	51.64	51.4	48.11	52.4	52.13	52.45	52.85	52.19	52.05	51.33	51.31	52.21	52.23	50.62	53.3	53.07	51.13
desulfosporosinus_acididurans_strain_M1	50.94	58.32	58.4	58.37	50.67	63.17	63.13	63.22	62.95	62.96	63.03	63.42	63.11	64.86	63.07	63.32	63.87	50.93	100	84	72.41	71.99	72.09	71.99	71.99	52.74	52.09	52.3	52.17	53.17	52.17	51.74	48.06	53.58	52.67	52.92	53.1	53.06	52.77	51.98	52.19	52.09	52.09	57.58	52.65	52.64	63.89
Desulfosporosinus_acidiphilus_DSM_22704_all	50.57	58.66	58.75	58.78	51.32	63.53	63.36	63.33	63.37	63.31	63.38	63.66	63.68	64.93	63.5	63.5	64.35	51.34	84.03	100	72.18	72.39	72.12	72.09	72.15	52.38	52.17	51.96	52.3	53.23	52.15	52.03	47.93	53.39	52.82	53.06	52.94	53.02	53.09	51.97	52.34	52.18	52.18	57.58	52.77	52.87	64.45
Desulfosporosinus_meridiei_DSM_13257	51.11	58.82	58.86	58.83	51.21	64.05	63.9	63.76	63.69	63.62	63.85	63.8	63.64	65.24	63.66	63.99	63.07	51.61	72.41	72.2	100	79.36	94.27	73.81	80.48	52.74	52.47	52.22	52.05	53.2	52.34	52.32	48.36	53.57	52.68	52.9	53.26	53.56	52.92	52.31	52.46	52.08	52.12	57.61	53.46	53.37	63.14
Desulfosporosinus_orientis_DSM_765	50.92	58.84	58.52	58.42	51.46	63.89	63.34	63.62	63.5	63.6	63.5	63.68	63.47	65.12	63.53	64	63.01	51.43	71.99	72.39	79.36	100	79.34	73.08	78.85	53	52.81	52.43	52.75	53.53	52.34	52.59	48.51	53.77	52.67	53.28	53.61	53.36	52.93	52.38	52.48	52.17	52.03	57.88	53.61	53.38	62.86
Desulfosporosinus_sp._HMP52.gbk_protein_multifasta	50.9	58.72	58.39	58.38	51.19	64	64.05	63.69	63.76	63.73	63.83	63.86	63.76	65.19	63.69	64	63.19	51.4	72.09	72.12	94.27	79.34	100	73.99	80.29	52.72	52.44	52.26	52.08	53.32	52.21	52.14	48.25	53.5	52.51	53.11	53.49	53.6	52.9	52.34	52.2	52.07	52.07	57.69	53.37	53.09	63.04
Desulfosporosinus_sp._Tol-M_Ga0063340	51.03	59.36	59.35	59.3	53.1	63.38	63.38	63.58	63.82	63.08	63.35	63.41	63.5	64.97	63.36	63.39	64.21	51.39	71.99	72.11	73.81	73.08	73.99	100	74.59	53.04	52.58	51.92	52.09	52.8	52.18	53.03	48.02	53.5	52.96	52.76	52.51	52.82	53.1	52.52	52.13	52.63	52.73	58.2	53.43	53.24	64.13
Desulfosporosinus_youngiae_DSM_17734	51.16	58.75	58.72	58.67	51.71	65.09	64.84	65.59	65.39	65.25	65.48	64.9	65.67	65.42	65.68	65.05	62.79	51.59	71.99	72.06	80.48	78.85	80.29	74.59	100	53.34	52.32	52.11	52.4	53.46	52.17	52.48	49.07	53.58	52.65	53.31	53.54	53.97	53.01	52.55	52.47	52.41	52.41	58.35	53.66	53.59	62.86
Desulfotomaculum_acetoxidans_5575_DSM_771	55.55	52.04	53.52	52.77	53.11	52.19	53.45	52.4	52.6	52.57	52.75	52.76	52.78	52.63	52.77	52.44	52.46	51.61	52.74	52.38	52.74	53	52.72	53.04	53.34	100	59.3	57.83	59.96	59.25	59.52	60.34	47.47	58.9	59.67	58.92	58.67	58.63	59.77	59.26	58.12	59.97	59.97	52.19	56.49	56.29	52.24
Desulfotomaculum_alcoholivorax_DSM_16058.gbk_protein_multifasta	56.36	51.77	52.11	52.08	52.89	51.87	51.9	51.9	52.61	51.72	51.79	51.9	51.91	52.35	51.69	51.9	52.7	51.49	52.09	52.12	52.47	52.81	52.44	52.58	52.32	59.3	100	58.13	86.36	59.67	71.97	70.19	47.23	59.35	61.46	59.35	58.32	58.14	61.82	70.51	61.09	60.07	60.17	50.68	56.43	56.42	52.08
Desulfotomaculum_alkaliphilum_DSM_12257.gbk_protein_multifasta	56.14	51.14	51.31	51.22	53.21	52.11	52.62	52.21	52.17	52.05	52.19	52.23	52.2	52.15	52.28	52.19	52.09	52.63	52.3	51.91	52.22	52.43	52.26	51.92	52.11	57.83	58.13	100	57.53	61.83	58.38	58.13	47.84	61.38	59.37	61.61	60.9	60.79	59.56	58.75	57.68	59.36	59.3	51.06	56.53	56.5	52.13
Desulfotomaculum_arcticum_DSM_17038.gbk_protein_multifasta	55.35	51.87	52	52.28	52.27	51.33	51.59	51.91	52.02	51.78	51.92	51.71	51.62	51.78	51.65	51.45	52.02	51.28	52.17	52.29	52.05	52.75	52.08	52.09	52.4	59.96	86.36	57.53	100	59	71.91	70.66	46.46	58.52	60.97	58.52	57.91	57.8	61.35	70.05	59.63	59.58	59.57	50.97	55.76	55.84	51.69
Desulfotomaculum_carboxydivorans_CO-1-SRB,_DSM_14880.gbk_protein_multifasta	56.69	52.1	52.06	52.11	53.07	53.43	53.18	53.23	53.23	53.15	53.19	53.35	53.15	53.52	53.11	53.4	53.52	52.59	53.17	53.23	53.2	53.53	53.32	52.8	53.46	59.25	59.67	61.83	59	100	60.18	59.42	47.61	74.68	60.88	99.05	73.97	73.82	60.9	59.48	60.56	60.72	60.76	52.07	57.52	57.84	53.3
Desulfotomaculum_geothermicum_DSM_3669.gbk_protein_multifasta	56.54	51.21	51.63	51.62	52.16	51.92	51.86	51.75	51.74	51.72	51.79	51.93	51.76	51.8	51.81	52	52.77	51.64	52.17	52.1	52.34	52.34	52.21	52.18	52.17	59.52	71.97	58.38	71.91	60.18	100	73.88	46.9	59.93	63.04	59.77	58.5	58.82	63.3	74.11	61.83	61.31	61.31	51.12	57	56.74	52.74
Desulfotomaculum_gibsoniae_Groll_DSM_7213	55.92	51.31	53.19	52.12	52.61	51.61	52.8	52.02	52.88	52.12	52.59	51.98	52.64	52.05	52.43	51.84	52.49	51.4	51.74	52.03	52.32	52.59	52.14	53.03	52.48	60.34	70.19	58.13	70.66	59.42	73.88	100	47.2	59.3	61.36	59.29	58.7	58.63	61.45	80.89	60.21	60.08	60.28	51.57	55.88	56.02	52.51
Desulfotomaculum_guttoideum_DSM_4024	46.45	48.34	47.96	47.89	47.05	49.48	48.82	50.31	50.14	50.09	50.05	49.62	50.29	48.04	49.95	49.32	46.79	48.11	48.06	47.91	48.36	48.51	48.25	48.02	49.07	47.47	47.23	47.84	46.46	47.61	46.9	47.2	100	47.93	47.56	47.56	47.93	48.38	48.09	47.34	47.46	47.16	47.14	49.41	48.19	48.12	46.63
Desulfotomaculum_hydrothermale_Lam5	56.78	52.36	52.34	52.3	53.72	53.63	53.34	53.52	53.61	53.19	53.58	53.51	53.56	53.63	53.41	53.6	53.57	52.4	53.58	53.37	53.57	53.77	53.5	53.5	53.58	58.9	59.35	61.38	58.52	74.68	59.93	59.3	47.93	100	60.39	74.25	74.23	72.43	60.6	59.47	60.11	60.46	60.36	51.58	57.24	57.27	53.37
Desulfotomaculum_kuznetsovii_17_DSM_6115	59.58	51.94	51.83	51.85	52.46	52.68	52.76	52.25	52.34	52.11	52.38	52.33	52.37	52.99	52.21	52.74	53.89	52.13	52.67	52.8	52.68	52.67	52.51	52.96	52.65	59.67	61.46	59.37	60.97	60.88	63.04	61.36	47.56	60.39	100	60.32	58.68	59.41	86.65	62.13	63.21	63.53	63.53	51.38	57.36	57.75	53.56
Desulfotomaculum_nigrificans_DSM_574.gbk_protein_multifasta	56.79	51.95	52.01	52.05	52.85	53.22	53.14	52.94	52.93	52.66	52.96	53.11	53.03	53.45	52.95	53.07	53.51	52.45	52.92	53.02	52.9	53.28	53.11	52.76	53.31	58.92	59.35	61.61	58.52	99.05	59.77	59.29	47.56	74.25	60.32	100	73.41	73.55	60.81	59.43	60.27	60.5	60.5	51.96	57.18	57.56	53.15
Desulfotomaculum_reducens_MI-1	55.61	51.88	52.2	52.09	53.06	53.74	53.25	53.35	53.36	53.39	53.3	53.59	53.35	53.68	53.43	53.64	52.83	52.85	53.1	52.87	53.26	53.61	53.49	52.51	53.54	58.67	58.32	60.9	57.91	73.97	58.5	58.7	47.93	74.23	58.68	73.41	100	71.7	59.13	58.77	58.74	59.01	59.01	51.37	56.51	56.38	52.42
Desulfotomaculum_ruminis_DL_DSM_2154	55.93	52.09	51.89	51.81	52.59	53.14	52.57	54.05	53.95	53.77	54.06	53.74	53.97	52.86	54.09	53.34	52.45	52.19	53.06	52.98	53.56	53.36	53.6	52.82	53.97	58.63	58.14	60.79	57.8	73.82	58.82	58.63	48.38	72.43	59.41	73.55	71.7	100	59.54	58.34	58.58	59.63	59.63	51.76	56.42	56.29	52.36
Desulfotomaculum_thermocisternum_DSM_10259.gbk_protein_multifasta	59.04	51.84	52	52.04	52.75	52.75	52.83	52.47	52.58	52.56	52.54	52.69	52.66	53.05	52.6	52.81	53.83	52.05	52.77	53.08	52.92	52.93	52.9	53.1	53.01	59.77	61.82	59.56	61.35	60.9	63.3	61.45	48.09	60.6	86.65	60.81	59.13	59.54	100	62.25	63.11	63.22	63.21	51.66	57.55	57.56	53.79
Desulfotomaculum_thermosapovorans_DSM_6562.gbk_protein_multifasta	56.4	51.77	51.89	51.78	52.36	52.67	52.15	52.32	52.36	52.34	52.46	52.3	52.45	52.2	52.31	52.58	52.61	51.33	51.98	51.97	52.31	52.38	52.34	52.52	52.55	59.26	70.51	58.75	70.05	59.48	74.11	80.89	47.34	59.47	62.13	59.43	58.77	58.34	62.25	100	61.15	60.73	60.73	50.68	56.36	56.14	52.34
Desulfurispora_thermophila_DSM_16022.gbk_protein_multifasta	56.67	51.54	51.47	51.47	52.08	52.18	51.97	51.77	51.75	51.69	51.74	51.78	51.82	52.48	51.75	52.08	53.2	51.31	52.19	52.31	52.46	52.48	52.2	52.13	52.47	58.12	61.09	57.68	59.63	60.56	61.83	60.21	47.46	60.11	63.21	60.27	58.74	58.58	63.11	61.15	100	60.54	60.54	50.89	56.17	56.48	52.95
Pelotomaculum_thermopropionicum_SI	58.18	51.85	51.8	51.78	52.59	52.65	52.58	52.12	52.22	52.03	52.15	52.34	52.15	52.63	52	52.73	53.22	52.21	52.09	52.14	52.08	52.17	52.07	52.63	52.41	59.97	60.07	59.36	59.58	60.72	61.31	60.08	47.16	60.46	63.53	60.5	59.01	59.63	63.22	60.73	60.54	100	100	51.58	57.95	58.26	53.06
Pelotomaculum_thermopropionicum_SI.gbk_protein_multifasta	58.2	51.84	51.8	51.78	52.59	52.67	52.58	52.09	52.24	52.03	52.17	52.34	52.17	52.63	52.08	52.68	53.22	52.23	52.09	52.14	52.12	52.03	52.07	52.73	52.41	59.97	60.17	59.3	59.57	60.76	61.31	60.28	47.14	60.36	63.53	60.5	59.01	59.63	63.21	60.73	60.54	100	100	51.58	57.95	58.26	53.05
Syntrophobotulus_glycolicus_FlGlyR,_DSM_8271.gbk_protein_multifasta	50.49	63.11	62.84	62.84	51.14	58.48	58.41	58.36	59.09	59.03	58.89	59.23	59.05	58.15	58.34	58.44	57.08	50.62	57.58	57.54	57.61	57.88	57.69	58.2	58.35	52.19	50.68	51.06	50.97	52.07	51.12	51.57	49.41	51.58	51.38	51.96	51.37	51.76	51.66	50.68	50.89	51.58	51.58	100	52.68	52.57	57.03
Thermincola_ferriacetica_DSM_14005.gbk_protein_multifasta	54.17	52.98	52.98	52.97	53.89	53.48	53.14	53.25	53.3	53.24	53.36	53.33	53.29	53.62	53.28	53.56	53.28	53.3	52.65	52.76	53.46	53.61	53.37	53.43	53.66	56.49	56.43	56.53	55.76	57.52	57	55.88	48.19	57.24	57.36	57.18	56.51	56.42	57.55	56.36	56.17	57.95	57.95	52.68	100	97.59	53.43
Thermincola_potens_JR.gbk_protein_multifasta	54.42	52.94	52.79	52.76	53.7	53.47	53.03	53.32	53.21	53.16	53.34	53.31	53.2	53.41	53.14	53.43	53.31	53.07	52.64	52.87	53.37	53.38	53.09	53.24	53.59	56.29	56.42	56.5	55.84	57.84	56.74	56.02	48.12	57.27	57.75	57.56	56.38	56.29	57.56	56.14	56.48	58.26	58.26	52.57	97.59	100	53.47
peptococcaceae_bacterium_CEB3	51.82	57.73	57.95	57.98	51.4	61.87	61.82	61.52	61.45	61.46	61.32	61.41	61.27	63.67	61.36	61.99	89.3	51.13	63.89	64.47	63.14	62.86	63.04	64.13	62.86	52.24	52.08	52.13	51.69	53.3	52.74	52.51	46.63	53.37	53.56	53.15	52.42	52.36	53.79	52.34	52.95	53.06	53.05	57.03	53.43	53.47	100
